# Supplementary material
Source: ML conference proceedings conference paper supplement (https://openaccess.thecvf.com/content/CVPR2024/html/Wang_UFC-Net_Unrolling_Fixed-point_CVPR_2024_paper.html)
Supplement: Supplementary file [file Wang_UFC-Net_Unrolling_Fixed-point_CVPR_2024_supplemental.pdf]

# UFC-Net: Unrolling Fixed-point Continuous Network for Deep Compressive Sensing

## Supplementary Material

### 1. Traditional FPC Algorithm

Fixed-Point Continuation (FPC), a frequently employed signal reconstruction algorithm in compressive sensing (CS), incrementally enhances signal sparsity through a series of iterative steps to achieve signal recovery. In comparison to iterative shrinkage/thresholding algorithm (ISTA), FPC leverages operator splitting techniques combined with path-following strategies to address the  $\ell_1$ -norm regularization problem, as follows:

$$\min_{\mathbf{x} \in \mathbb{R}^N} \|\mathbf{x}\|_{\ell_1} + \frac{\mu}{2} \|\mathbf{A}\mathbf{x} - \mathbf{y}\|_{\ell_2}^2, \quad (1)$$

where  $\mu$  serves as a penalty coefficient, striking a balance between the data fitting term and the  $\ell_1$ -norm regularization term.

Let  $g(\mathbf{x}) = \|\mathbf{x}\|_{\ell_1}$ ,  $f(\mathbf{x}) = \frac{1}{2} \|\mathbf{A}\mathbf{x} - \mathbf{y}\|_{\ell_2}^2$ . Hence, we can reformulate Eq. (1) as follows:  $F(\mathbf{x}) = g(\mathbf{x}) + \mu f(\mathbf{x})$ . Furthermore, let  $T(\mathbf{x}) = \partial F(\mathbf{x})$ . According to the principles of operator splitting theory, it is feasible to decompose the function  $F$  into the summation of two convex functions:  $F = F_1 + F_2$ . Likewise, the operator  $T$  can also be disassembled into the sum of two maximally monotone operators:  $T = T_1 + T_2$ . Through rigorous derivation (for comprehensive details, please refer to [4]), the iterative formula for obtaining the minimal solution of  $F(\mathbf{x})$  can be articulated as follows:

$$\mathbf{x}^{k+1} = (I + \tau T_1)^{-1} (I - \tau T_2) \mathbf{x}^k. \quad (2)$$

For the minimization problem,  $T_1$  is defined as  $\nabla g(\mathbf{x}^k)$  and  $T_2$  is defined as  $\mu \nabla f(\mathbf{x}^k)$ , while  $(I + \tau T_1)^{-1}$  corresponds to a soft thresholding operation.

This subsequently leads to the specific iterative steps of the FPC algorithm as outlined below:

$$\begin{aligned} \mathbf{x}^{k+1} &= s_\nu \circ h(\mathbf{x}^k) \\ &= \text{sgn}(h(\mathbf{x}^k)) \odot \max\{|h(\mathbf{x}^k)| - \nu, 0\}, \end{aligned} \quad (3)$$

where

$$h(\mathbf{x}^k) = I(\mathbf{x}^k) - \tau \nabla f(\mathbf{x}^k), \quad (4)$$

where  $h(\cdot)$  bears a resemblance to the gradient descent iterations of  $f(\mathbf{x}^k)$  intuitively,  $s_\nu(\cdot)$  embodies the soft thresholding function.  $\tau$  represents the gradient descent step size,  $\nu$  signifies the soft thresholding shrinkage operator, and there exists an equivalence relationship that  $\mu\nu = \tau$ .

Moreover, FPC introduces a continuation strategy for  $\mu$  and incorporates a regularization shrinkage parameter  $\beta$  that

escalates the regularization parameter  $\mu$  during the iterative process, resulting in a sequence of growing regularization parameters  $\{\mu_i\}$ , instead of using a fixed soft thresholding shrinkage operator. When addressing a new problem associated with  $\mu_{i+1}$ , the approximate solution of the current problem with  $\mu_i$  is employed as the starting point, thereby enhancing the algorithm's convergence speed.

### 2. Implementation Details

We selectively procure a subset of 800 images from the extensively employed large-scale training dataset, COCO2017 [9]. In conjunction with data augmentation techniques, we extract 300 individual  $32 \times 32$  pixel patches from each image, employing random horizontal and vertical flips, rotations, and scaling procedures. Moreover, Set11 [8] dataset is incorporated as a validation set for the evaluation of the generalization capabilities of our UFC-Net.

We harness the Adam optimization strategy [6] along with a cosine annealing scheme, encompassing a total of 100 iterations. The learning rate progressively diminishes from  $5 \times 10^{-4}$  to  $5 \times 10^{-5}$ , with a warm-up phase spanning three iterations. Image manipulations are executed within the YCbCr color space, with evaluations performed on the Y channel. To assess the quality of reconstruction images, we conduct sufficient experiments on extensive datasets, including large-scale datasets such as CIFAR10 and CIFAR100 [7], as well as various widely-recognized benchmark datasets, such as Set5 [1], Set11 [8], Set14 [17], McM18 [18], BSD68 [10], Urban100 [5], and General100 [2]. Furthermore, we employ the widely adopted evaluation metrics, namely peak signal noise ratio (PSNR) and structural similarity (SSIM), in conjunction with a visual examination of the reconstructed images, to comprehensively evaluate the quality of the reconstruction images.

Moreover, as far as CS-MRI related experiments are concerned, the training dataset for this experiment comprises 4865 images extracted from the FastMRI knee dataset [16], with an additional set of 995 images designated for testing purposes. The experiment spans a total of 200 epochs, with a batch size of 1 and a learning rate cosinly decayed from  $5 \times 10^{-5}$  to  $1 \times 10^{-6}$ . The inputs are magnetic resonance images of dimensions  $320 \times 320$ . Within each iteration stage in the reconstruction module, we first perform the gradient descent computations in the GDU on images with a scale of  $(b, 1, 320, 320)$ , where  $b$  means batch size. Subsequently, it is reshaped into  $(b \cdot 100, 1, 32, 32)$  and fed into the CAM module for further processing. Finally, the output of CAM

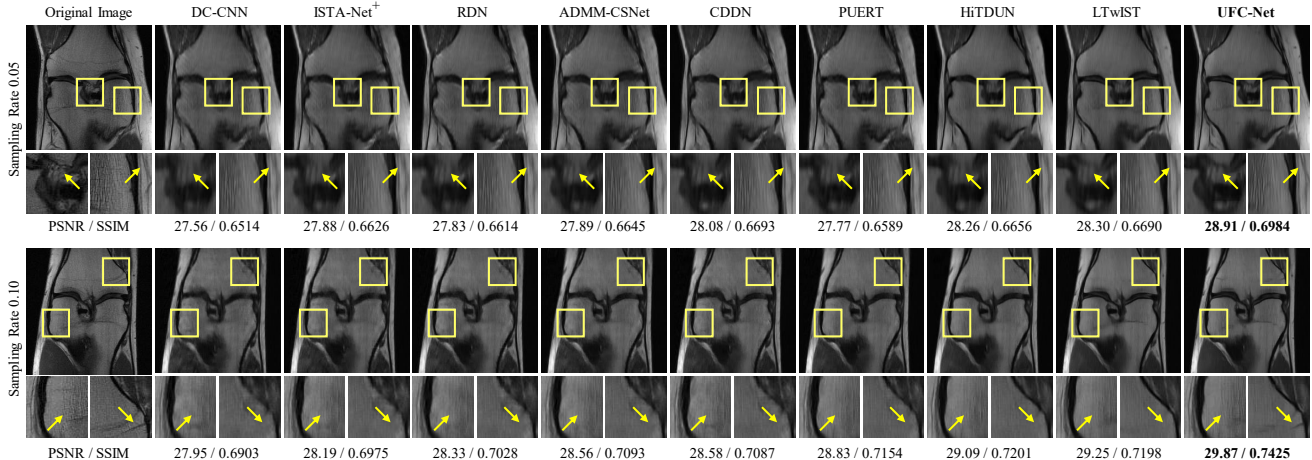

Figure 1. Comparisons of reconstructed MRI images from the FastMRI dataset [16] between UFC-Net and other eight competing algorithms. The first row pertains to comparative images at  $\delta = 0.05$ , while the second row corresponds to comparative images at  $\delta = 0.10$ . Regions of interest are magnified, with distinctive differences indicated by arrows for ease of observation. It is evident that our method reconstructs textures with enhanced clarity and incorporates a greater level of fine-grained details.

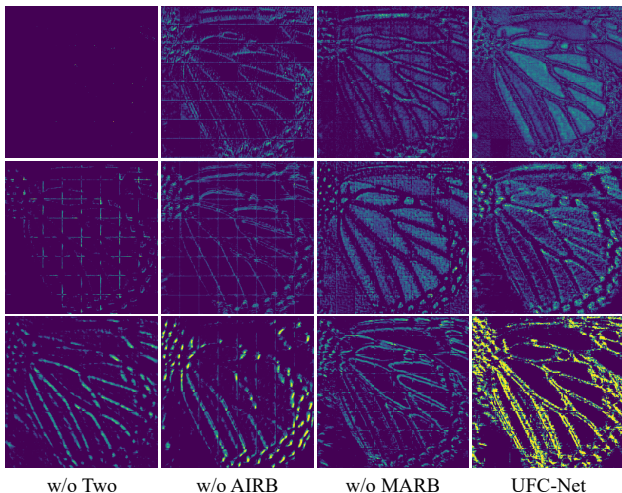

Figure 2. Visual analysis of feature maps of our UFC-Net and the three variants derived from it at different iteration stages when  $\delta = 0.10$ . The first, second and third rows correspond to the feature maps of the third, fourth and fifth stages in the reconstruction module respectively.

is restored to  $(b, 1, 320, 320)$  as the input of the next stage. Furthermore, to expedite the training process in the CS-MRI experiments, the number of iterative stages is adjusted to 6.

### 3. Ablation Study

#### 3.1. Visual Analysis of Feature Maps

Fig. 2 depicts the visual analysis of the feature maps derived from our UFC-Net and three variants w/o Two, w/o AIRB, and w/o MARB at different iteration stages when  $\delta = 0.10$ .

It is obviously that our MARB and AIRB are capable of capturing more image details and textures.

#### 3.2. UFC-Net with Different Iterative Stages

To comprehensively investigate the performance of our UFC-Net, we derive four variations with distinct numbers of iterative stages, designated as UFC-Net- $\{8, 9, 10, 11\}$ , with UFC-Net-10 being the default configuration, while the others adhere to the same training specifications as previously described.

Table 1. PNSR (dB) and SSIM comparisons of UFC-Net- $\{8, 9, 10, 11\}$  on datasets Set11 [8] and BSD68 [10] at different sampling rates  $\delta = \{0.01, 0.04, 0.10, 0.25\}$ .

| Datasets | $\delta$ | UFC-Net-8 |        | UFC-Net-9    |               | UFC-Net-10 (default) |               | UFC-Net-11   |               |
|----------|----------|-----------|--------|--------------|---------------|----------------------|---------------|--------------|---------------|
|          |          | PSNR      | SSIM   | PSNR         | SSIM          | PSNR                 | SSIM          | PSNR         | SSIM          |
| Set11    | 0.01     | 21.22     | 0.5591 | 21.19        | 0.5589        | <b>21.24</b>         | <b>0.5607</b> | <u>21.23</u> | <b>0.5612</b> |
|          | 0.04     | 25.81     | 0.7904 | <u>25.87</u> | <u>0.7934</u> | <b>25.92</b>         | <b>0.7943</b> | 25.81        | 0.7920        |
|          | 0.10     | 29.96     | 0.8930 | 30.01        | 0.8938        | <b>30.15</b>         | <b>0.8960</b> | <u>30.08</u> | <u>0.8948</u> |
|          | 0.25     | 35.26     | 0.9559 | 35.30        | 0.9560        | <b>35.42</b>         | <b>0.9567</b> | <u>35.34</u> | <u>0.9561</u> |
| BSD68    | 0.01     | 22.33     | 0.5261 | <u>22.35</u> | <u>0.5264</u> | <b>22.37</b>         | <b>0.5268</b> | <u>22.35</u> | <u>0.5264</u> |
|          | 0.04     | 25.27     | 0.6868 | <u>25.29</u> | <b>0.6880</b> | <b>25.30</b>         | <u>0.6877</u> | 25.26        | 0.6865        |
|          | 0.10     | 27.89     | 0.8065 | 27.91        | <u>0.8071</u> | <b>27.95</b>         | <b>0.8086</b> | <u>27.93</u> | <u>0.8071</u> |
|          | 0.25     | 31.70     | 0.9087 | 31.71        | <u>0.9091</u> | <b>31.74</b>         | <b>0.9093</b> | <u>31.72</u> | <u>0.9087</u> |

As presented in Tab. 1, we carry out evaluations on the Set11 and BSD68 datasets at four diverse sampling rates  $\delta \in \{0.01, 0.04, 0.10, 0.25\}$ . The optimal outcomes are predominantly concentrated in UFC-Net-10 (the default configuration), while the secondary best results are unevenly distributed between UFC-Net-9 and UFC-Net-11. Overall, with an increase of the number of iterative stages, the performance of our UFC-Net gradually improves initially, reaching a saturation at UFC-Net-10, after which it begins to decline, accompanied by a progressive increase



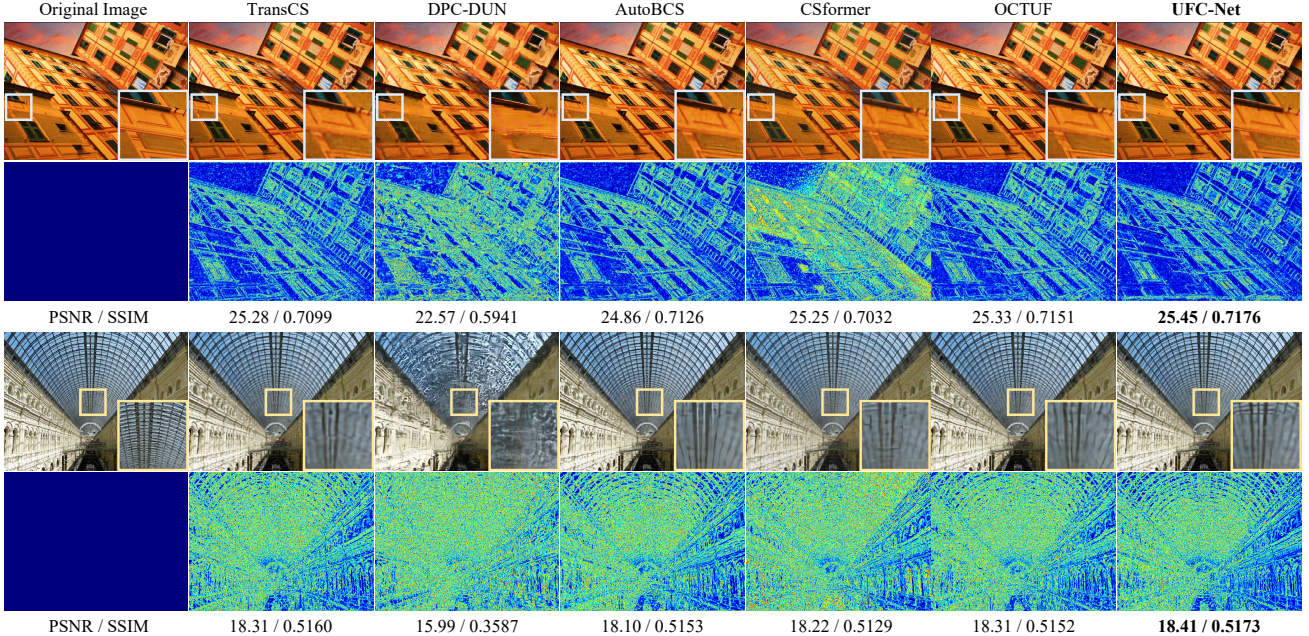

Figure 3. Visual comparisons of reconstruction images and error maps of other five competing methods and our proposed UFC-Net under noises when the sampling rate  $\delta = 0.04$ . The first and second rows correspond to the reconstructed images and error maps respectively when the Gaussian noise  $\sigma = 0.004$ . The third and fourth rows correspond to the reconstructed images and error maps respectively at the salt and pepper noise  $\epsilon = 0.98$ . Local areas are zoomed in for better comparisons.

in complexity. Therefore, it is a better choice to define the number of iterative stages in reconstruction module as 10.

### 3.3. UFC-Net under Different Noises

This part is primarily dedicated to evaluating the robustness of our proposed UFC-Net in the presence of varying levels of noise. On the CIFAR10 dataset, we examine three types of zero-mean Gaussian noise, characterized by distinct variance levels, denoted as  $\sigma \in \{0.001, 0.002, 0.004\}$ . Subsequently, we conduct comparative evaluations between our UFC-Net and TransCS [12], DGUNet+ [11], OCTUF [14], focusing on their Gaussian noise robustness at sampling rates of 0.01 and 0.04. The outcomes are outlined in Tab. 2. It is evident that our UFC-Net consistently maintains peak PSNR and SSIM values, significantly surpassing the second-ranking OCTUF algorithm. For instance, UFC-Net outperforms OCTUF by a substantial margin, enhancing PSNR (percentage gains) by 0.65dB ( $\sim 3.69\%$ ) and SSIM (percentage gains) by 0.0478 ( $\sim 15.57\%$ ) when  $\sigma = 0.002$  and  $\delta = 0.01$ .

Moreover, we study different levels of salt and pepper noise on the CIFAR100 dataset, expressed as  $\epsilon \in \{0.94, 0.96, 0.98\}$ . We conduct a comparative analysis in the Tab. 3 of DPC-DUN [13], CSformer [15], AutoBCS [3] and our UFC-Net regarding the salt and pepper noise robustness at sampling rates of 0.01 and 0.04. From the numerical results in the Tab. 3, our proposed UFC-

Net consistently exhibits superior performance. Particularly, in comparison to the second-best algorithm, AutoBCS, our UFC-Net demonstrates a significant improvement of 0.72dB ( $\sim 4.06\%$ ) in PSNR and a notable increase of 0.0424 ( $\sim 13.16\%$ ) in SSIM, when  $\epsilon = 0.98$  and  $\delta = 0.01$ . These results show that our UFC-Net can reconstruct high-quality images even under the influence of different noises.

Furthermore, when  $\delta = 0.04$ , we show the reconstructed images and error maps of TransCS [12], DPC-DUN [13], AutoBCS [3], CSformer [15], OCTUF [14] and our proposed UFC-Net under Gaussian noise  $\sigma = 0.004$ , and the salt and pepper noise  $\epsilon = 0.98$  respectively in Fig. 3. It can be seen that our UFC-Net has higher visual performance and lower reconstruction error.

Table 2. PSNR (dB) and SSIM comparisons of UFC-Net and state-of-the-art methods with various Gaussian noise levels on dataset CIFAR10 [7] at  $\delta = \{0.01, 0.04\}$ .

| $\sigma$ | $\delta$ | TransCS [12] |        | DGUNet+ [11] |        | OCTUF [14]   |               | UFC-Net      |               |
|----------|----------|--------------|--------|--------------|--------|--------------|---------------|--------------|---------------|
|          |          | PSNR         | SSIM   | PSNR         | SSIM   | PSNR         | SSIM          | PSNR         | SSIM          |
| 0.001    | 0.01     | 16.49        | 0.2946 | 15.23        | 0.2720 | <u>17.61</u> | <u>0.3073</u> | <b>18.26</b> | <b>0.3550</b> |
|          | 0.04     | 19.29        | 0.5746 | 19.41        | 0.5601 | <u>21.35</u> | <u>0.6278</u> | <b>21.66</b> | <b>0.6387</b> |
| 0.002    | 0.01     | 16.48        | 0.2945 | 15.20        | 0.2717 | <u>17.60</u> | <u>0.3070</u> | <b>18.25</b> | <b>0.3548</b> |
|          | 0.04     | 19.26        | 0.5728 | 19.41        | 0.5617 | <u>21.29</u> | <u>0.6253</u> | <b>21.60</b> | <b>0.6362</b> |
| 0.004    | 0.01     | 16.47        | 0.2939 | 15.13        | 0.2704 | <u>17.59</u> | <u>0.3067</u> | <b>18.24</b> | <b>0.3545</b> |
|          | 0.04     | 19.19        | 0.5690 | 19.40        | 0.5626 | <u>21.18</u> | <u>0.6201</u> | <b>21.50</b> | <b>0.6314</b> |

Table 3. PNSR (dB) and SSIM comparisons of UFC-Net and state-of-the-art methods with various Salt and Pepper noise levels on dataset CIFAR100 [7] at  $\delta = \{0.01, 0.04\}$ .

| $\epsilon$ | $\delta$ | DPC-DUN [13] |        | CSformer [15] |        | AutoBCS [3] |        | UFC-Net      |               |
|------------|----------|--------------|--------|---------------|--------|-------------|--------|--------------|---------------|
|            |          | PSNR         | SSIM   | PSNR          | SSIM   | PSNR        | SSIM   | PSNR         | SSIM          |
| 0.98       | 0.01     | 14.64        | 0.2013 | 16.53         | 0.3004 | 17.74       | 0.3222 | <b>18.46</b> | <b>0.3646</b> |
|            | 0.04     | 16.72        | 0.3718 | 20.29         | 0.5667 | 21.25       | 0.6197 | <b>21.80</b> | <b>0.6325</b> |
| 0.96       | 0.01     | 14.32        | 0.1914 | 16.57         | 0.2999 | 17.74       | 0.3211 | <b>18.41</b> | <b>0.3612</b> |
|            | 0.04     | 16.03        | 0.3348 | 20.07         | 0.5520 | 21.01       | 0.6064 | <b>21.44</b> | <b>0.6147</b> |
| 0.94       | 0.01     | 14.08        | 0.1835 | 16.59         | 0.2990 | 17.73       | 0.3194 | <b>18.35</b> | <b>0.3581</b> |
|            | 0.04     | 15.45        | 0.3043 | 19.85         | 0.5387 | 20.77       | 0.5927 | <b>21.11</b> | <b>0.5983</b> |

Table 4. Comparisons of UFC-Net and its variants on dataset Set11 at the sampling rate  $\delta = 0.10$ .

| Methods | woT-RB | woT-U  | woMA-RB | woMA-U | woAI-RB | woAI-U | UFC-Net       |
|---------|--------|--------|---------|--------|---------|--------|---------------|
| PSNR    | 29.68  | 29.64  | 29.82   | 29.63  | 29.78   | 29.59  | <b>30.15</b>  |
| SSIM    | 0.8883 | 0.8878 | 0.8911  | 0.8890 | 0.8887  | 0.8881 | <b>0.8960</b> |
| LPIPS   | 0.0786 | 0.0796 | 0.0774  | 0.0787 | 0.0789  | 0.0787 | <b>0.0755</b> |

Table 5. Comparisons of UFC-Net with different loss functions on different datasets at the sampling rate  $\delta = 0.25$ .

| Loss Function      | Set11        |               | Set14        |               | Urban100     |               | General100   |               |
|--------------------|--------------|---------------|--------------|---------------|--------------|---------------|--------------|---------------|
|                    | PSNR         | SSIM          | PSNR         | SSIM          | PSNR         | SSIM          | PSNR         | SSIM          |
| MSE Loss (default) | <b>35.42</b> | <b>0.9567</b> | <b>33.81</b> | <b>0.9259</b> | <b>32.82</b> | <b>0.9423</b> | <b>37.75</b> | <b>0.9624</b> |
| L1 Loss            | 35.31        | 0.9561        | 33.69        | 0.9258        | 32.72        | 0.9409        | 37.66        | 0.9622        |
| Perceptual Loss    | 32.99        | 0.9423        | 31.33        | 0.9046        | 30.54        | 0.9242        | 35.20        | 0.9485        |

### 3.4. UFC-Net and Its Variants

We substitute MARB and AIRB in CAM with the standard residual block and UNet, resulting in six variations: woT-RB, woT-U, woMA-RB, woMA-U, woAI-RB, and woAI-U. Among them, woT-RB means using the standard residual block to replace the two blocks MARB and AIRB. Other variants are obtained through similar approaches. Tab. 4 illustrates the comparison results on the dataset Set11 at  $\delta = 0.10$ . Our UFC-Net consistently exhibits optimal performance and demonstrates significant improvement compared to the second-best variant, providing evidence for the superiority of our proposed MARB and AIRB.

### 3.5. UFC-Net with Different Loss Functions

We perform ablation studies on UFC-Net using various loss functions, including Mean Squared Error (MSE), L1 loss, and perceptual loss functions. As depicted in Tab. 5, UFC-Net exhibits superior performance when using MSE function, while showing suboptimal results under the L1 loss function.

### 3.6. UFC-Net under Perceptual Loss

As depicted in Tab. 6, we conduct a comparison of the LPIPS metric between proposed UFC-Net and different methods on datasets CIFAR10 and CIFAR100 at  $\delta = 0.04$ . The results consistently demonstrate that our UFC-Net outperforms other methods on different datasets.

Table 6. LPIPS comparisons of UFC-Net and other methods at  $\delta = 0.04$ .

| Methods  | TransCS | DGNet+ | DPC-DUN | LTwIST | AutoBCS | CSformer | OCTUF  | UFC-Net       |
|----------|---------|--------|---------|--------|---------|----------|--------|---------------|
| CIFAR10  | 0.4247  | 0.1695 | 0.1692  | 0.3910 | 0.3910  | 0.1469   | 0.1416 | <b>0.1351</b> |
| CIFAR100 | 0.4182  | 0.1722 | 0.1763  | 0.3816 | 0.3839  | 0.1496   | 0.1440 | <b>0.1376</b> |

## References

- [1] Marco Bevilacqua, Aline Roumy, Christine Guillemot, and Marie Line Alberi-Morel. Low-complexity single-image super-resolution based on nonnegative neighbor embedding. In *British Machine Vision Conference (BMVC)*, pages 135.1–135.10, 2012.
- [2] Chao Dong, Chen Change Loy, and Xiaoou Tang. Accelerating the super-resolution convolutional neural network. In *European Conference on Computer Vision (ECCV)*, pages 391–407, 2016.
- [3] Hongping Gan, Yang Gao, Chunyi Liu, Haiwei Chen, Tao Zhang, and Feng Liu. AutoBCS: Block-based image compressive sensing with data-driven acquisition and noniterative reconstruction. *IEEE Transactions on Cybernetics*, 53(4):2558–2571, 2023.
- [4] Elaine T. Hale, Wotao Yin, and Yin Zhang. Fixed-Point Continuation for  $l_1$ -minimization: Methodology and convergence. *SIAM Journal on Optimization*, 19(3):1107–1130, 2008.
- [5] Jia-Bin Huang, Abhishek Singh, and Narendra Ahuja. Single image super-resolution from transformed self-exemplars. In *Proceedings of the IEEE Conference on Computer Vision and Pattern Recognition (CVPR)*, 2015.
- [6] Diederik P Kingma and Jimmy Ba. Adam: A method for stochastic optimization. In *Proceedings of the International Conference on Learning Representations (ICLR)*, 2015.
- [7] Alex Krizhevsky, Ilya Sutskever, and Geoffrey E Hinton. Imagenet classification with deep convolutional neural networks. *Communications of the ACM*, 60(6):84–90, 2017.
- [8] Kuldeep Kulkarni, Suhas Lohit, Pavan Turaga, Ronan Keriviche, and Amit Ashok. ReconNet: Non-iterative reconstruction of images from compressively sensed measurements. In *Proceedings of the IEEE Conference on Computer Vision and Pattern Recognition (CVPR)*, pages 449–458, 2016.
- [9] Tsung-Yi Lin, Michael Maire, Serge Belongie, James Hays, Pietro Perona, Deva Ramanan, Piotr Dollár, and C Lawrence Zitnick. Microsoft COCO: Common objects in context. In *European Conference on Computer Vision (ECCV)*, pages 740–755, 2014.
- [10] D. Martin, C. Fowlkes, D. Tal, and J. Malik. A database of human segmented natural images and its application to evaluating segmentation algorithms and measuring ecological statistics. In *IEEE International Conference on Computer Vision (ICCV)*, pages 416–423, 2001.
- [11] Chong Mou, Qian Wang, and Jian Zhang. Deep generalized unfolding networks for image restoration. In *Proceedings of the IEEE Conference on Computer Vision and Pattern Recognition (CVPR)*, pages 17399–17410, 2022.
- [12] Minghe Shen, Hongping Gan, Chao Ning, Yi Hua, and Tao Zhang. TransCS: A transformer-based hybrid architecture for image compressed sensing. *IEEE Transactions on Image Processing*, 31:6991–7005, 2022.

- [13] Jiechong Song, Bin Chen, and Jian Zhang. Dynamic path-controllable deep unfolding network for compressive sensing. *IEEE Transactions on Image Processing*, 32:2202–2214, 2023.
- [14] Jiechong Song, Chong Mou, Shiqi Wang, Siwei Ma, and Jian Zhang. Optimization-inspired cross-attention transformer for compressive sensing. In *Proceedings of the IEEE Conference on Computer Vision and Pattern Recognition (CVPR)*, pages 6174–6184, 2023.
- [15] Dongjie Ye, Zhangkai Ni, Hanli Wang, Jian Zhang, Shiqi Wang, and Sam Kwong. CSformer: Bridging convolution and transformer for compressive sensing. *IEEE Transactions on Image Processing*, 32:2827–2842, 2023.
- [16] Jure Zbontar, Florian Knoll, Anuroop Sriram, Tullie Murrell, Zhengnan Huang, Matthew J Muckley, Aaron Defazio, Ruben Stern, Patricia Johnson, Mary Bruno, et al. FastMRI: An open dataset and benchmarks for accelerated MRI. *arXiv preprint arXiv:1811.08839*, 2018.
- [17] Roman Zeyde, Michael Elad, and Matan Protter. On single image scale-up using sparse-representations. In *International Conference Curves and Surfaces*, pages 711–730. Springer, 2012.
- [18] Lei Zhang, Xiaolin Wu, Antoni Buades, and Xin Li. Color demosaicking by local directional interpolation and nonlocal adaptive thresholding. *Journal of Electronic Imaging*, 20(2): 023016, 2011.
